# Supplementary material for: Co(iii) protoporphyrin IX chloride in solution: spin-state and metal coordination revealed from resonant inelastic X-ray scattering and electronic structure calculations
Source: Royal Society of Chemistry journal article supplement (doi:10.1039/c4cp04703f), 2014-12-12
Supplement: c4cp04703f1.pdf [file c4cp04703f1.pdf]

**Supporting Information for ‘Co(III) protoporphyrin IX chloride in solution:  
Spin-state and metal coordination revealed from resonant inelastic X-ray  
scattering and electronic structure calculations’**

Kaan Atak<sup>a,b</sup>, Ronny Golnak<sup>a,c</sup>, Jie Xiao<sup>a</sup>, Mika Pflüger<sup>a,b</sup>, Tim Brandenburg<sup>a,b</sup>, Bernd Winter<sup>a</sup>, and Emad F. Aziz<sup>\*,a,b,d</sup>

<sup>a</sup> Institute of Methods for Material Development, Helmholtz-Zentrum Berlin für Materialien und Energie, Albert-Einstein-Strasse 15, 12489 Berlin, Germany

<sup>b</sup> Freie Universität Berlin, Fachbereich Physik, Arnimallee 14, D-14195 Berlin, Germany

<sup>c</sup> Freie Universität Berlin, Fachbereich Chemie, Takustr. 3, D-14195 Berlin, Germany

<sup>d</sup> Institute for Molecular Science, Myodaiji, Okazaki 444-8585, Japan

**\*Corresponding Author**

Email: [emad.aziz@helmholtz-berlin.de](mailto:emad.aziz@helmholtz-berlin.de)

|                                | CoPP9-Cl S=2               | CoPP9-Cl S=1               | CoPP9-Cl S=0               |
|--------------------------------|----------------------------|----------------------------|----------------------------|
| Co-Cl bond distance (Å)        | 2.225                      | 2.303                      | 2.201                      |
| Co-N bond distance (Å)         | 2.101, 2.087, 2.093, 2.082 | 2.003, 2.008, 1.994, 2.003 | 1.994, 1.995, 1.989, 1.992 |
| Cl-Co-N bond angle (°)         | 104.9, 102.3, 106.7, 104.7 | 93.6, 99.3, 95.4, 101.2    | 93.8, 95.2, 95.8, 96.7     |
| N-Co-N bond angle (°)          | 86.4, 86.4, 86.1, 86.5     | 89.3, 89.2, 89.1, 89.2     | 89.6, 89.5, 89.3, 89.6     |
| Total dipole moment (Debye)    | 1.14                       | 3.69                       | 1.38                       |
| Total single point energy (eV) | -100065.96                 | -100066.18                 | -100066.12                 |

**Table SI-1.** The coordination of cobalt in CoPPIX chloride varying with different spin configurations according to the B3LYP/def2-TZVP(-f)/def2-TZV/J (un)restricted (open shell) DFT optimization calculations.

| Occupation | Bond character                    | MO number                                             |
|------------|-----------------------------------|-------------------------------------------------------|
| Occupied   | $\pi$ anti-bonding                | 167, 166, 161, 160, 157                               |
|            | $\sigma$ bonding                  | 152, 149, 146, 144, 143, 141, 140, 138, 135           |
|            | $\pi$ bonding                     | 168, 164, 163, 162, 156, 154, 153, 151, 150, 148, 147 |
|            | $\pi$ bonding/ $\pi$ anti-bonding | 165, 155                                              |
| Unoccupied | $\sigma$ anti-bonding             | 173, 170                                              |
|            | $\pi$ anti-bonding                | 171, 172                                              |

**Table SI-2.** The bond character of the MOs of lowest spin-state CoPPIX chloride according to the B3LYP/def2-TZVP(-f)/def2-TZV/J restricted DFT ground-state calculations.

For a detailed classification of the bonding structure between the cobalt centre and its nearest neighbours, all the MOs with bonding properties are inspected and the results are presented in Table SI-2. The orbitals prominent in the absorption process are either  $\sigma$  anti-bonding (LUMO, LUMO+3) or  $\pi$  anti-bonding (LUMO+1, LUMO+2) type. The corresponding bonding MOs are several occupied orbitals lying in the valence region. There are also a few occupied  $\pi$  anti-bonding orbitals but no  $\sigma$ -type anti-bonding orbital existing in the molecules. MOs 165 and 155 are particularly interesting because they show bonding

character on two adjacent nitrogen atoms while anti-bonding character on the other two. The unoccupied orbitals 188 and 189 exhibit a weak interaction between  $d_{xz}$  and  $d_{yz}$  of cobalt and nitrogen orbitals in the form of a weak  $\pi$  anti-bonding. This concludes our description of the local electronic structure on the Co sites of the porphyrin molecules which lacks  $\pi$  back-bonding hybridizations.

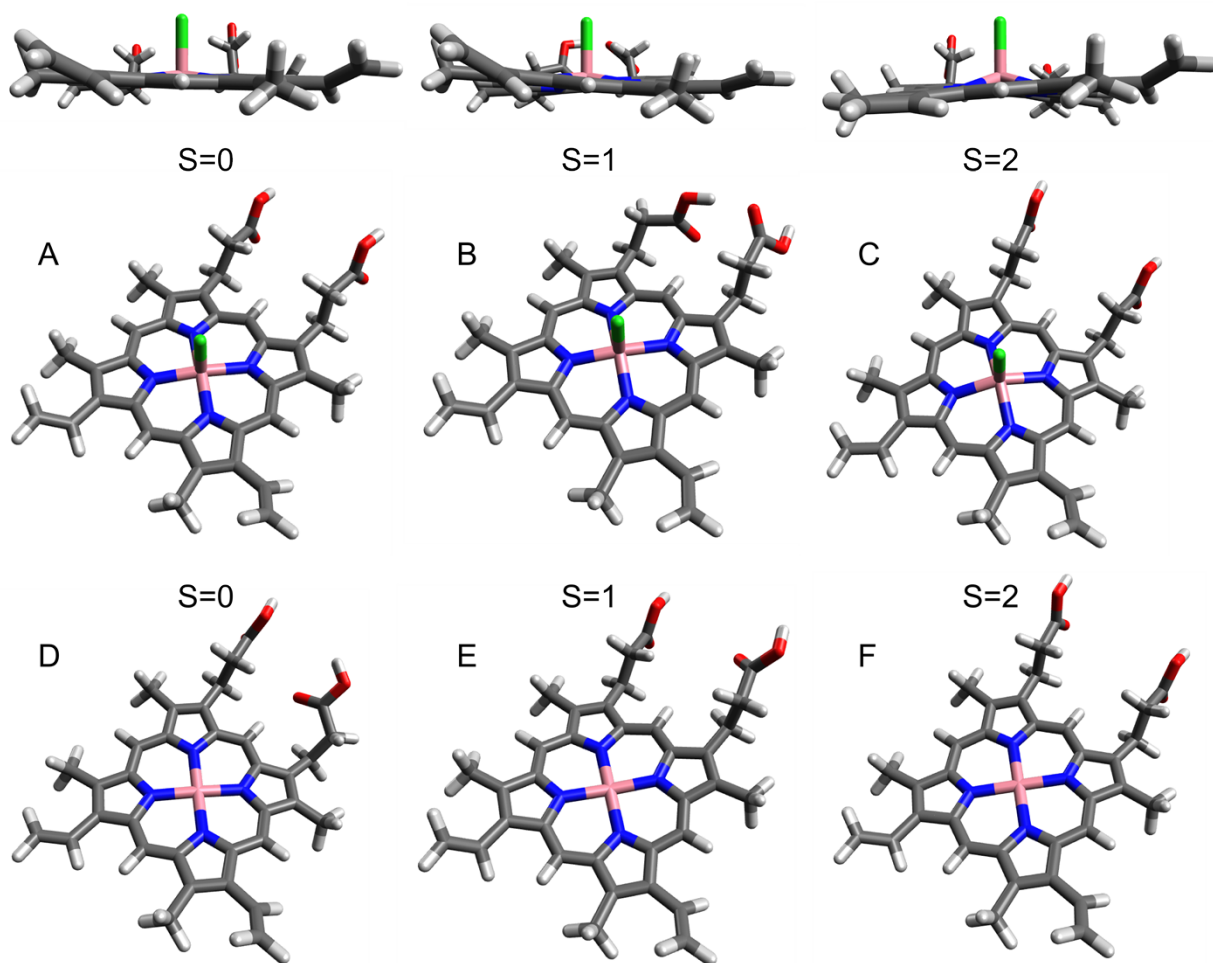

**Figure SI-1.** Molecular geometries of Co(III) protoporphyrin IX with (A-C) and without (D-F) a chloride bound to the cobalt center. Spin states are: S=0 (A), S=1 (B), S=2 (C), S=0 (D), S=1 (E), S=2 (F).

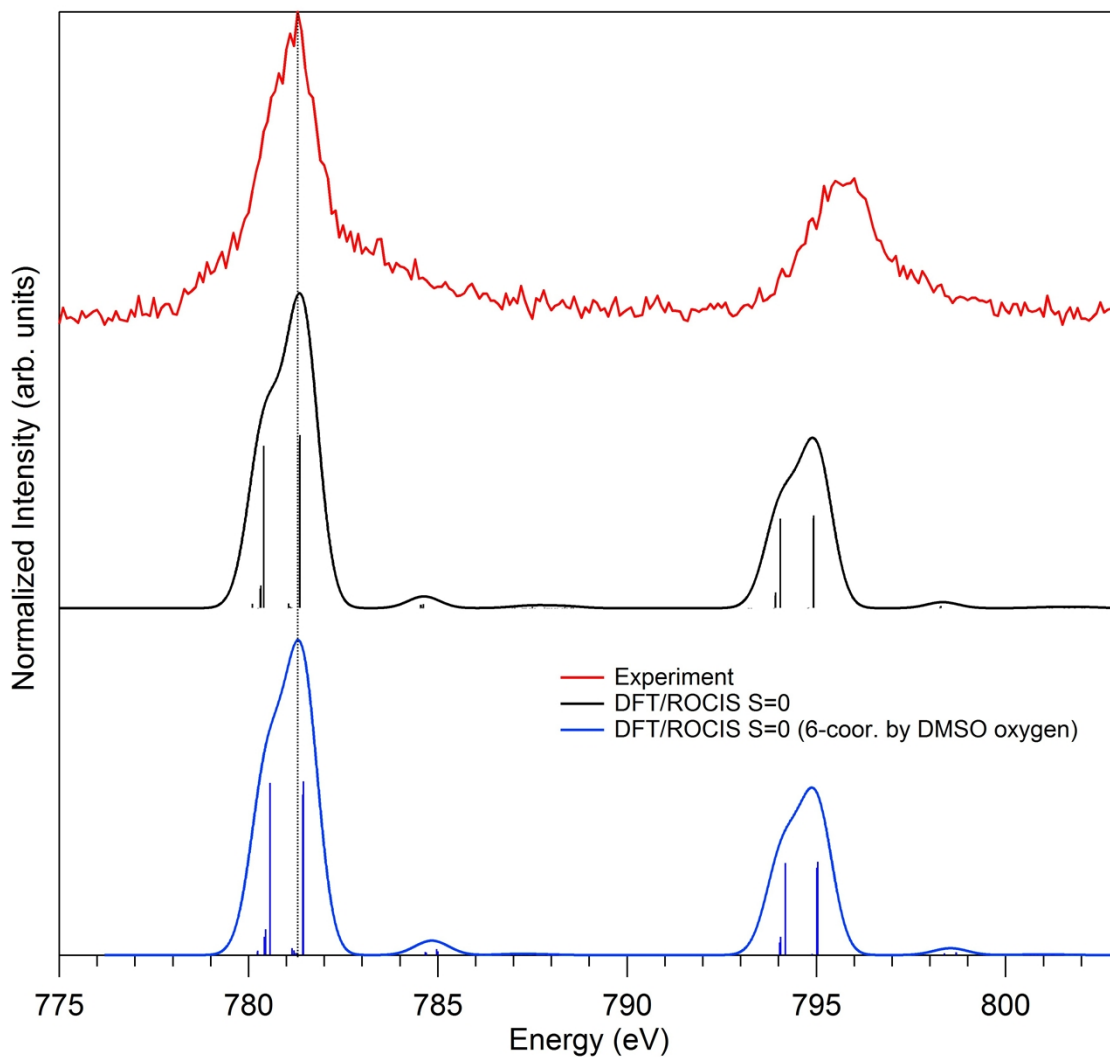

**Figure SI-2.** Experimental cobalt L-edge PFY spectrum of 50mM CoPPIX chloride solution in DMSO and DFT/ROCIS XA calculations for spin  $S = 0$  for the 5- and 6-coordinated species. The 6<sup>th</sup> coordination is provided by the oxygen atom of dimethyl-sulfoxide. The computed spectra are shifted *ad hoc* by 16.35 eV (black trace) and 16.2 eV (blue trace).

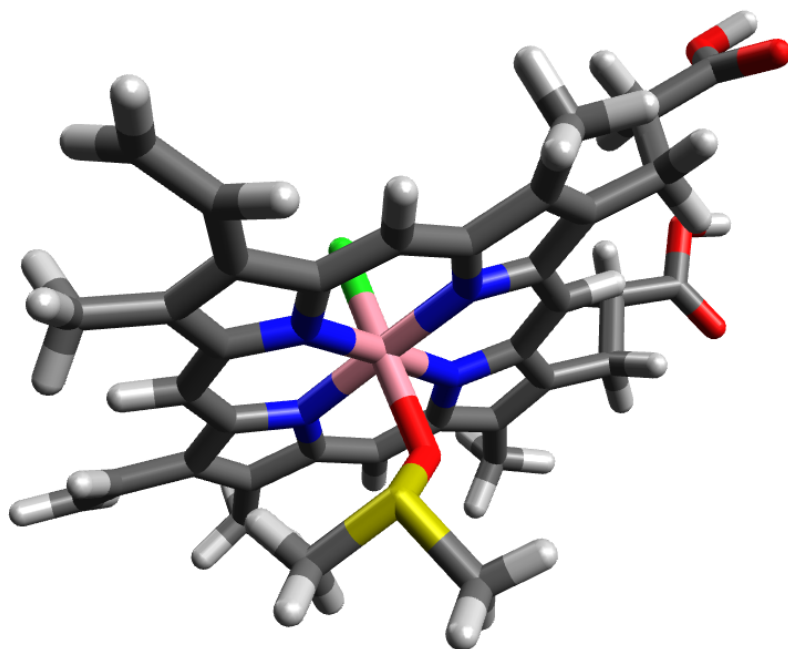

**Figure SI-3.** Molecular geometry of Co(III) protoporphyrin IX with DMSO oxygen in the cobalt's sixth-coordination site (S=O).

|                                | DMSO-CoPP9-Cl S=O          |
|--------------------------------|----------------------------|
| Co-Cl bond distance (Å)        | 2.228                      |
| Co-N bond distance (Å)         | 1.996, 1.994, 2.009, 2.010 |
| Co-O bond distance (Å)         | 2.117                      |
| Cl-Co-N bond angle (°)         | 91.3, 91.6, 90.8, 90.7     |
| N-Co-N bond angle (°)          | 90.1, 89.9, 90.4, 89.5     |
| Total dipole moment (Debye)    | 7.05                       |
| Total single point energy (eV) | -115118.24                 |

**Table SI-3.** The coordination of cobalt in DMSO-CoPPIX-Cl according to the B3LYP/def2-TZVP(-f)/def2-TZV/J restricted DFT optimization calculations.
